# Supplementary material for: Comparing hand-based and controller-based interactions in virtual reality learning: effects on presence and interaction performance
Source: PeerJ journal article supplement (doi:10.7717/peerj-cs.3168), 2025-08-28
Supplement: Structured_Observation_Form_EN.pdf [file Structured_Observation_Form_EN.pdf]

# Structured Observation Form

**Observation Date:** \_\_\_\_\_

**Observer's Name:** \_\_\_\_\_

**Student Name/ID:** \_\_\_\_\_

## **Experimental Group:**

- ☐ Manual Interaction
- ☐ Controller-based Interaction

## **1. Technology Usage**

### **1.1 Device Handling Skills**

- ☐ Excellent (Uses the device with ease and without issues)
- ☐ Good (Generally uses the device correctly, rarely has issues)
- ☐ Fair (Experiences some difficulties in using the device)
- ☐ Poor (Experiences constant difficulties in using the device)

### **1.2 Following Instructions**

- ☐ Excellent (Follows all instructions correctly and quickly)
- ☐ Good (Follows most instructions correctly)
- ☐ Fair (Has difficulty following some instructions)
- ☐ Poor (Fails to follow most instructions)

## **2. Interaction and Engagement**

### **2.1 Interaction Level**

- ☐ Very High (Constantly active and interactive)
- ☐ High (Mostly active and interactive)
- ☐ Medium (Occasionally active and interactive)
- ☐ Low (Rarely active and interactive)

### **2.2 Participation and Interest**

- ☐ Very Interested (Shows high interest in all activities)
- ☐ Interested (Shows interest in most activities)
- ☐ Moderately Interested (Shows interest in some activities)
- ☐ Uninterested (Shows no interest in most activities)

### 3. Problem-Solving and Adaptability

#### 3.1 Problem-Solving Skills

---

- ☐ Excellent (Solves encountered problems quickly and effectively)
- ☐ Good (Can solve most problems independently)
- ☐ Fair (Has difficulty solving some problems)
- ☐ Poor (Cannot solve most problems and constantly asks for help)

#### 3.2 Adaptability

- ☐ Very High (Adapts quickly to changing situations)
- ☐ High (Adapts well to most situations)
- ☐ Medium (Has some difficulty adapting to certain situations)
- ☐ Low (Has difficulty adapting to most situations)

### 4. Overall Assessment

#### 4.1 Overall Performance

- ☐ Excellent
- ☐ Good
- ☐ Fair
- ☐ Poor

#### 4.2 Notes and Observations

---

---

---

---
